# Supplementary material
Source: PubMed Central journal article supplement (PMC8959738)
Supplement: KaufmannSupp.pdf [file KaufmannSupp.pdf]

## Supplemental materials for

Kaufmann J, Marino M, Lucas J, et al. Racial and ethnic disparities in acute care use for pediatric asthma. *Ann Fam Med.* 2022;20(2):116-122.

**Supplemental Table 1.** Characteristics of Oregon-Medicaid-recipient children age 3-17 years with asthma having had a minimum of one year observation time in the ADVANCE Clinical Research Network, 2012-2018.

| Characteristic                            | All, No. (%) | Group, No. (%)     |                    |                       |                       |
|-------------------------------------------|--------------|--------------------|--------------------|-----------------------|-----------------------|
|                                           |              | Non-Hispanic White | Non-Hispanic Black | Latinx prefer English | Latinx prefer Spanish |
| Patients                                  | N=6555       | N=2716             | N=574              | N=925                 | N=2340                |
| Female                                    | 2822 (43.1%) | 1214 (44.7%)       | 252 (43.9%)        | 410 (44.3%)           | 946 (40.4%)           |
| Age at 1 <sup>st</sup> Visit, mean(SD), y | 8.2 (3.7)    | 8.9 (3.8)          | 8.1 (3.8)          | 8.2 (3.8)             | 7.4 (3.3)             |
| Body Mass Index <sup>a</sup>              |              |                    |                    |                       |                       |
| Never Overweight                          | 2451 (37.4%) | 1158 (42.6%)       | 253 (44.1%)        | 344 (37.2%)           | 696 (29.7%)           |
| Sometimes Overweight                      | 1478 (22.5%) | 581 (21.4%)        | 103 (17.9%)        | 190 (20.5%)           | 604 (25.8%)           |
| Always Overweight                         | 2626 (40.1%) | 977 (36.0%)        | 218 (38.0%)        | 391 (42.3%)           | 1040 (44.4%)          |
| Payor Type                                |              |                    |                    |                       |                       |
| Some Private & Public                     | 520 (7.9%)   | 320 (11.8%)        | 33 (5.7%)          | 60 (6.5%)             | 107 (4.6%)            |
| Some Public                               | 6035 (92.1%) | 2396 (88.2%)       | 541 (94.3%)        | 865 (93.5%)           | 2233 (95.4%)          |
| Federal Poverty Level                     |              |                    |                    |                       |                       |
| Always >138%                              | 346 (5.3%)   | 218 (8.0%)         | 13 (2.3%)          | 46 (5.0%)             | 69 (2.9%)             |
| Above & Below 138%                        | 2046 (31.2%) | 647 (23.8%)        | 125 (21.8%)        | 279 (30.2%)           | 995 (42.5%)           |
| Always ≤138%                              | 3786 (57.8%) | 1560 (57.4%)       | 421 (73.3%)        | 545 (58.9%)           | 1260 (53.8%)          |
| Not Documented                            | 377 (5.8%)   | 291 (10.7%)        | 15 (2.6%)          | 55 (5.9%)             | 16 (0.7%)             |
| Urbanicity <sup>b</sup>                   |              |                    |                    |                       |                       |
| Metropolitan                              | 5381 (82.1%) | 1999 (73.6%)       | 558 (97.2%)        | 752 (81.3%)           | 2072 (88.5%)          |
| Micropolitan                              | 828 (12.6%)  | 485 (17.9%)        | 12 (2.1%)          | 125 (13.5%)           | 206 (8.8%)            |
| Rural                                     | 346 (5.3%)   | 232 (8.5%)         | 4 (0.7%)           | 48 (5.2%)             | 62 (2.6%)             |
| Visits Per Year                           |              |                    |                    |                       |                       |
| <2                                        | 2804 (42.8%) | 1247 (45.9%)       | 307 (53.5%)        | 440 (47.6%)           | 810 (34.6%)           |
| [2, 3)                                    | 1399 (21.3%) | 540 (19.9%)        | 103 (17.9%)        | 187 (20.2%)           | 569 (24.3%)           |
| 3+                                        | 2352 (35.9%) | 929 (34.2%)        | 164 (28.6%)        | 298 (32.2%)           | 961 (41.1%)           |
| Max Asthma Severity <sup>c</sup>          |              |                    |                    |                       |                       |
| Intermittent                              | 1806 (27.6%) | 714 (26.3%)        | 172 (30.0%)        | 252 (27.2%)           | 668 (28.5%)           |
| Mild Persistent                           | 698 (10.6%)  | 245 (9.0%)         | 63 (11.0%)         | 86 (9.3%)             | 304 (13.0%)           |
| Mod-Severe Persistent                     | 523 (8.0%)   | 199 (7.3%)         | 60 (10.5%)         | 66 (7.1%)             | 198 (8.5%)            |
| Not Documented                            | 3528 (53.8%) | 1558 (57.4%)       | 279 (48.6%)        | 521 (56.3%)           | 1170 (50.0%)          |
| Flu Vaccination Rate                      |              |                    |                    |                       |                       |
| less than 50% annually                    | 4642 (70.8%) | 2154 (79.3%)       | 434 (75.6%)        | 695 (75.1%)           | 1359 (58.1%)          |
| 50-80% annually                           | 1373 (20.9%) | 402 (14.8%)        | 106 (18.5%)        | 168 (18.2%)           | 697 (29.8%)           |

|                                       |              |              |             |             |              |
|---------------------------------------|--------------|--------------|-------------|-------------|--------------|
| at least 80% annually                 | 540 (8.2%)   | 160 (5.9%)   | 34 (5.9%)   | 62 (6.7%)   | 284 (12.1%)  |
| Pneumococcal Vaccination Ever         | 3896 (59.4%) | 1353 (49.8%) | 326 (56.8%) | 553 (59.8%) | 1664 (71.1%) |
| Smoker                                |              |              |             |             |              |
| Never                                 | 4776 (72.9%) | 1568 (57.7%) | 379 (66.0%) | 688 (74.4%) | 2141 (91.5%) |
| Ever                                  | 295 (4.5%)   | 195 (7.2%)   | 40 (7.0%)   | 30 (3.2%)   | 30 (1.3%)    |
| Passive Only                          | 1339 (20.4%) | 857 (31.6%)  | 144 (25.1%) | 184 (19.9%) | 154 (6.6%)   |
| Not Documented                        | 145 (2.2%)   | 96 (3.5%)    | 11 (1.9%)   | 23 (2.5%)   | 15 (0.6%)    |
| Albuterol Rx Yearly Rate,<br>mean(SD) | 0.6 (0.6)    | 0.6 (0.6)    | 0.7 (0.6)   | 0.6 (0.6)   | 0.7 (0.5)    |
| Inhaled Corticosteroid Rx Ever        | 2569 (39.2%) | 952 (35.1%)  | 219 (38.2%) | 339 (36.6%) | 1059 (45.3%) |

<sup>a</sup> BMI calculated using the `chiltds` package in R based on age, sex, weight, and height. Overweight if BMI over the 85th percentile, obese if over the 95th percentile. Biologically implausible values were flagged as over 8 standard deviations over or 4 under the mean BMI. Patient category reflects all available measures during study period.

<sup>b</sup> RUCA classification code based on 2010 census tract information and patients' primary clinic zip code.

<sup>c</sup> Maximum asthma severity diagnosed in an ambulatory visits encounter or documented in the patient problem list.

**Supplemental Table 2.** Asthma exacerbation outcomes among Oregon-Medicaid recipient children (age 3-17) with asthma, at community health center ambulatory visits (AV), for children having had at least 1 AV in the ADVANCE Clinical Research Network, 2012-2018.

| Oregon Community Health Center Ambulatory Visits for Asthma Exacerbation |                           |             |                    |                           |             |                    |
|--------------------------------------------------------------------------|---------------------------|-------------|--------------------|---------------------------|-------------|--------------------|
| Probability (P) of Exacerbation Visit Ever                               | Unadjusted                |             |                    | Adjusted                  |             |                    |
|                                                                          | Predicted(P) <sup>a</sup> | OR          | 95% CI             | Predicted(P) <sup>a</sup> | OR          | 95% CI             |
| <i>Group</i>                                                             |                           |             |                    |                           |             |                    |
| <i>Non-Hispanic White</i>                                                | 23.3%                     | Ref         |                    | 26.9%                     | Ref         |                    |
| <i>Non-Hispanic Black</i>                                                | 26.5%                     | 1.18        | (0.93,1.50)        | 27.6%                     | 1.04        | (0.82,1.33)        |
| <i>Latinx, Prefer English</i>                                            | 23.8%                     | 1.03        | (0.88,1.20)        | 26.8%                     | 1.00        | (0.85,1.18)        |
| <i>Latinx, Prefer Spanish</i>                                            | <b>32.9%</b>              | <b>1.61</b> | <b>(1.40,1.85)</b> | <b>31.9%</b>              | <b>1.36</b> | <b>(1.17,1.58)</b> |
| Yearly Rate (R) of Exacerbation Visits                                   | Unadjusted                |             |                    | Adjusted                  |             |                    |
|                                                                          | Predicted(R) <sup>b</sup> | RR          | 95% CI             | Predicted(R) <sup>b</sup> | RR          | 95% CI             |
| <i>Group</i>                                                             |                           |             |                    |                           |             |                    |
| <i>Non-Hispanic White</i>                                                | 12.1                      | Ref         |                    | 17.1                      | Ref         |                    |
| <i>Non-Hispanic Black</i>                                                | 16.6                      | 1.37        | (0.98,1.92)        | 17.2                      | 1.00        | (0.78,1.28)        |
| <i>Latinx, Prefer English</i>                                            | 13.8                      | 1.14        | (0.96,1.36)        | 17.7                      | 1.03        | (0.89,1.20)        |
| <i>Latinx, Prefer Spanish</i>                                            | <b>20.2</b>               | <b>1.66</b> | <b>(1.36,2.04)</b> | 19.8                      | 1.15        | (0.98,1.36)        |

**NOTE:** OR, odds ratio; RR rate ratio, CI, confidence interval; Ref, reference. Statistically significant results (i.e. p-value < 0.05) are bolded. Estimates were derived using general estimating equations logistic (binary outcomes) or negative binomial (rate outcomes) regression and robust sandwich variance estimation for clustering of patients within clinics. Adjusted regression included covariates for age, sex, body-mass index, insurance type, federal poverty level, urbanicity, documented asthma severity, number of yearly visits, albuterol and inhaled corticosteroid prescriptions, influenza and pneumococcal vaccinations, and tobacco-smoke exposure.

<sup>a</sup> Predicted probability of ever having a visit with clinic-coded asthma exacerbation; adjusted results are averaged over covariates.

<sup>b</sup> Predicted yearly rate of visits per 100-person years with clinic-coded asthma exacerbation; adjusted results are averaged over covariates.

**Supplemental Table 3.** Asthma-related hospital inpatient admission outcomes for Oregon-Medicaid recipient children with asthma age 3-17, having had at least 1 community health center visit in the ADVANCE Clinical Research Network, 2012-2018 (N = 6,555).

| <b>Asthma-Related Hospital In-Patient (IP) Admissions</b> |                                 |           |               |                                 |           |               |
|-----------------------------------------------------------|---------------------------------|-----------|---------------|---------------------------------|-----------|---------------|
| <b>Probability (P) of Asthma IP Admission Ever</b>        | Unadjusted                      |           |               | Adjusted                        |           |               |
|                                                           | <b>Predicted(P)<sup>a</sup></b> | <b>OR</b> | <b>95% CI</b> | <b>Predicted(P)<sup>a</sup></b> | <b>OR</b> | <b>95% CI</b> |
| <i><b>Group</b></i>                                       |                                 |           |               |                                 |           |               |
| <i>Non-Hispanic White</i>                                 | 3.4%                            | Ref       |               | 3.7%                            | Ref       |               |
| <i>Non-Hispanic Black</i>                                 | 4.1%                            | 1.21      | (0.78,1.88)   | 3.7%                            | 0.98      | (0.63,1.50)   |
| <i>Latinx, Prefer English</i>                             | 4.3%                            | 1.27      | (0.86,1.89)   | 4.5%                            | 1.23      | (0.81,1.86)   |
| <i>Latinx, Prefer Spanish</i>                             | 4.2%                            | 1.22      | (0.87,1.70)   | 3.8%                            | 1.03      | (0.75,1.42)   |
| <b>Yearly Rate (R) of Asthma IP Admissions</b>            | Unadjusted                      |           |               | Adjusted                        |           |               |
|                                                           | <b>Predicted(R)<sup>b</sup></b> | <b>RR</b> | <b>95% CI</b> | <b>Predicted(R)<sup>b</sup></b> | <b>RR</b> | <b>95% CI</b> |
| <i><b>Group</b></i>                                       |                                 |           |               |                                 |           |               |
| <i>Non-Hispanic White</i>                                 | 1.2                             | Ref       |               | 1.3                             | Ref       |               |
| <i>Non-Hispanic Black</i>                                 | 1.1                             | 0.90      | (0.55,1.48)   | 1.1                             | 0.85      | (0.56,1.29)   |
| <i>Latinx, Prefer English</i>                             | 1.5                             | 1.21      | (0.83,1.78)   | 1.5                             | 1.17      | (0.78,1.75)   |
| <i>Latinx, Prefer Spanish</i>                             | 1.1                             | 0.89      | (0.56,1.41)   | 1.1                             | 0.89      | (0.60,1.31)   |

**NOTE:** OR, odds ratio; RR rate ratio, CI, confidence interval; Ref, reference. Statistically significant results (i.e. p-value < 0.05) are bolded. Estimates were derived using general estimating equations logistic (binary outcomes) or negative binomial (rate outcomes) regression and robust sandwich variance estimation for clustering of patients within clinics. Adjusted regression included covariates for age, sex, body-mass index, federal poverty level, urbanicity, documented asthma severity, number of yearly visits, albuterol and inhaled corticosteroid prescriptions, influenza and pneumococcal vaccinations, and tobacco-smoke exposure.

<sup>a</sup> Predicted probability of ever having an asthma-related IP admissions; adjusted results are averaged over covariates.

<sup>b</sup> Predicted yearly rate of visits per 100-person years for asthma-related IP admissions; adjusted results are averaged over covariates.
